# Supplementary material for: Implementation of a Single Quadrupole Mass Spectrometer for Fingerprint Analysis: Venenum bufonis as a Case Study
Source: PubMed Central journal article supplement (PMC6278474; doi:10.3390/molecules23113020), 2018-11-19
Supplement: molecules-23-03020-s001.pdf [file molecules-23-03020-s001.pdf]

# Implementation of a single quadrupole mass spectrometer for fingerprint analysis: *Venenum bufonis* as a case study

Wenlong Wei <sup>1,2,†</sup>, Xia Wang <sup>2,†</sup>, Jinjun Hou <sup>2,†</sup>, Changliang Yao <sup>2</sup>, Zijin Feng <sup>2</sup>, Jianqing Zhang <sup>2</sup>, Sumei Han <sup>2</sup>, Yanping Deng <sup>2</sup>, Yong Huang <sup>2</sup>, Wanying Wu <sup>2,\*</sup>, Dean Guo <sup>2,\*</sup>

<sup>1</sup> School of Pharmacy, China Pharmaceutical University, Nanjing, Jiangsu 210009, China; 13521032532@163.com

<sup>2</sup> National Engineering Laboratory for TCM Standardization Technology, Shanghai Research Center for Modernization of Traditional Chinese Medicine, Shanghai Institute of Materia Medica, Chinese Academy of Science, Shanghai 201203 China; jinjun\_hou@simm.ac.cn; (J.H.); xiawang7788@163.com (X.W.); cpuyao@126.com (C.Y.); cpufzj@126.com (Z.F.); jianqingzhang0928@hotmail.com (J.Z.); yllhwssy@126.com (S.H.); shimbiro@sina.com (Y.D.); hydess@163.com (Y.H.)

\* Correspondence: wanyingwu@simm.ac.cn (W.W.); daguo@simm.ac.cn (D.G.); Tel.: +86-21-20231000 (ext.2221) (W.W. & D.G.); Fax: +86-21-50272789 (W.W. & D.G.)

† These two authors contributed equally to this work.

Received: 8 October 2018; Accepted: 13 November 2018; Published: date

## Supporting Information

### Mass Spectrometry conditions of Q-TOF-MS and QQQ-MS

The MSFs obatanind on Q-TOF-MS and QQQ-MS were used to compare the consistency of MSF obtained on ACQUITY QDa detector. The same chromatographic condition as that used in UPLC-PDA-QDa was applied. Positive mode in mass range of  $m/z$  150–800 was adopted at both the two MS instruments. For Waters Xevo G2-S Q-TOF mass spectrometer (Waters Corporation, Milford, MA, USA), capillary voltages of 2 kV, cone voltage of 40 V, cone gas flow of 30 L/h, source temperature of 140 °C, and desolvation gas flow of 700 L/h at 500 °C were utilized. A solution of leucine-enkephalin (1 µg/mL) was used as lock mass for data calibration. For Xevo QQQ micro mass spectrometer (Waters Corporation, Milford, MA, USA), capillary voltages of 3 kV and cone voltage of 30 V was set. Source temperature was 148 °C, and desolvation temperature was 597 °C. Cone gas flow was 50 L/h, and desolvation gas flow was 947 L/h. Data acquisition and processing were performed using MassLynx V4.1 software (Waters Corporation, Milford, MA, USA).

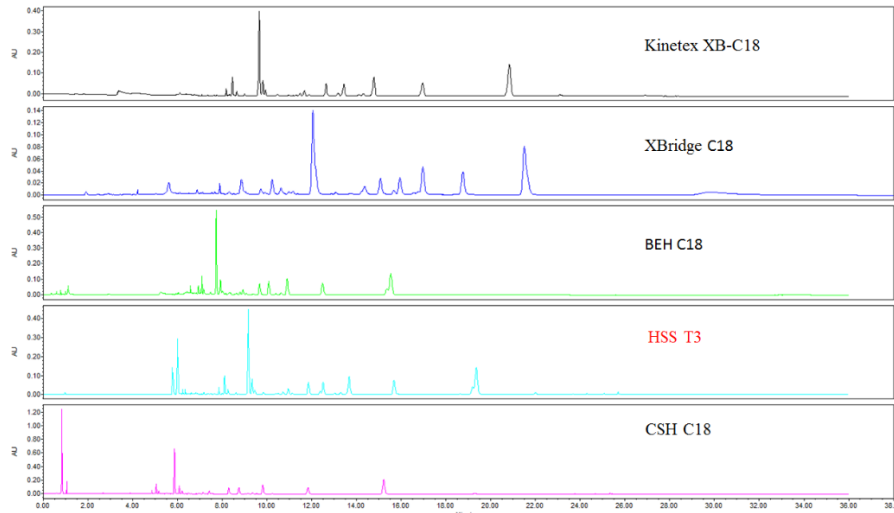

**Figure S1.** Optimization of columns of C18 mechanism.

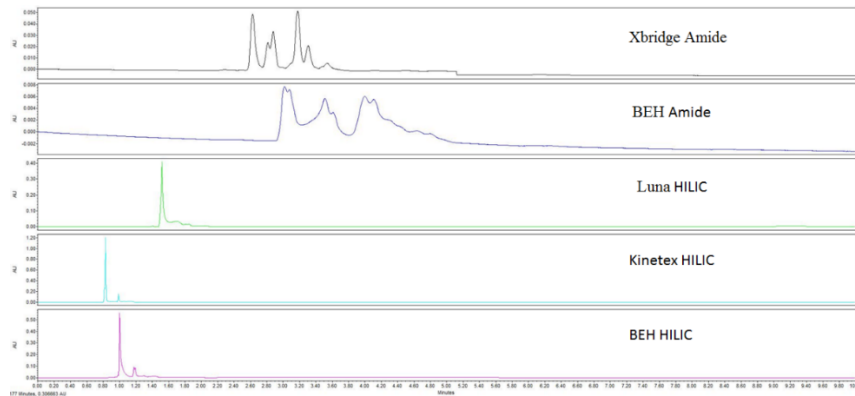

**Figure S2.** Optimization of columns of HILIC mechanism.

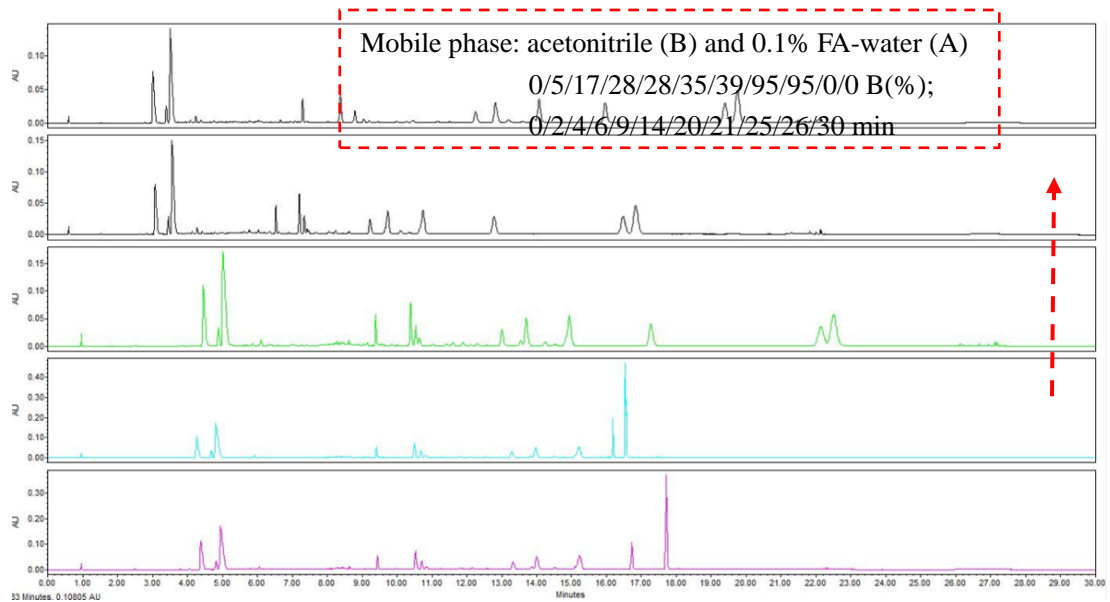

**Figure S3.** Optimization of gradient elution.

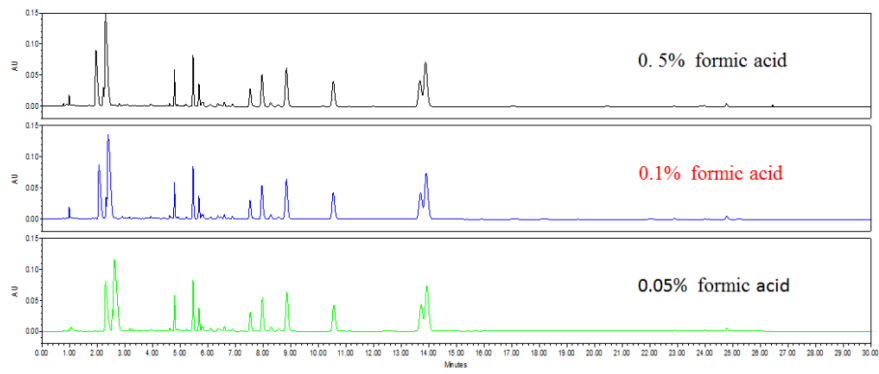

**Figure S4.** Optimization of concentration of formic acid.

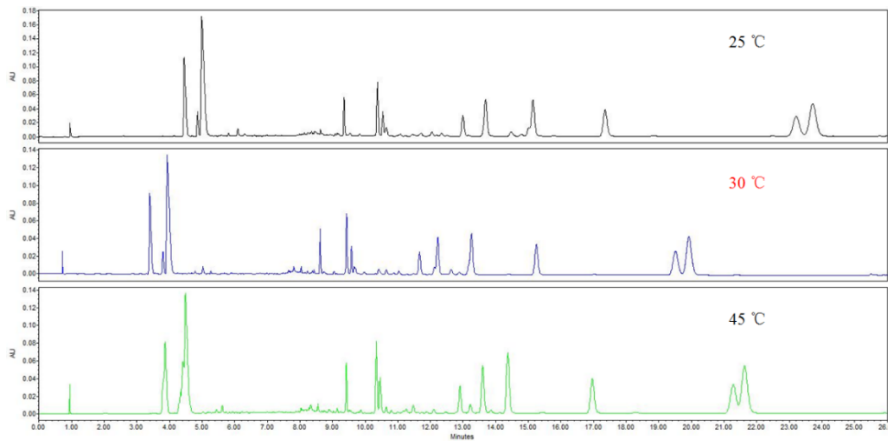

**Figure S5.** Optimization of gradient elution.

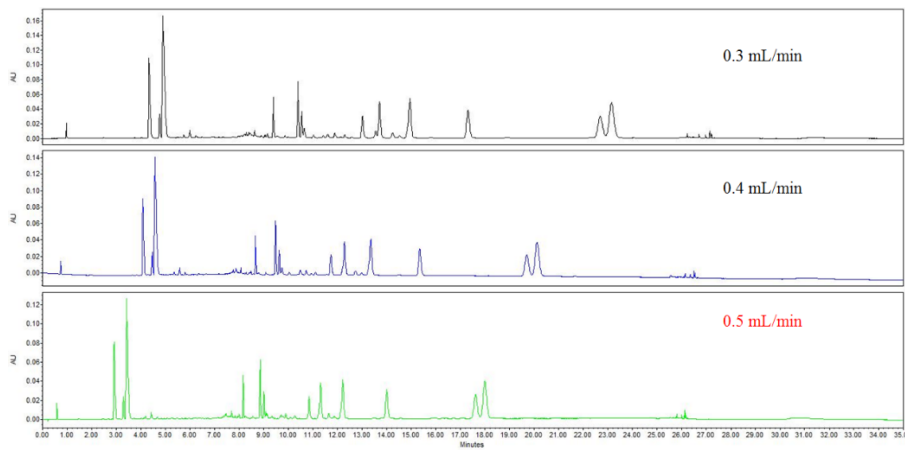

**Figure S6.** Optimization of gradient elution.

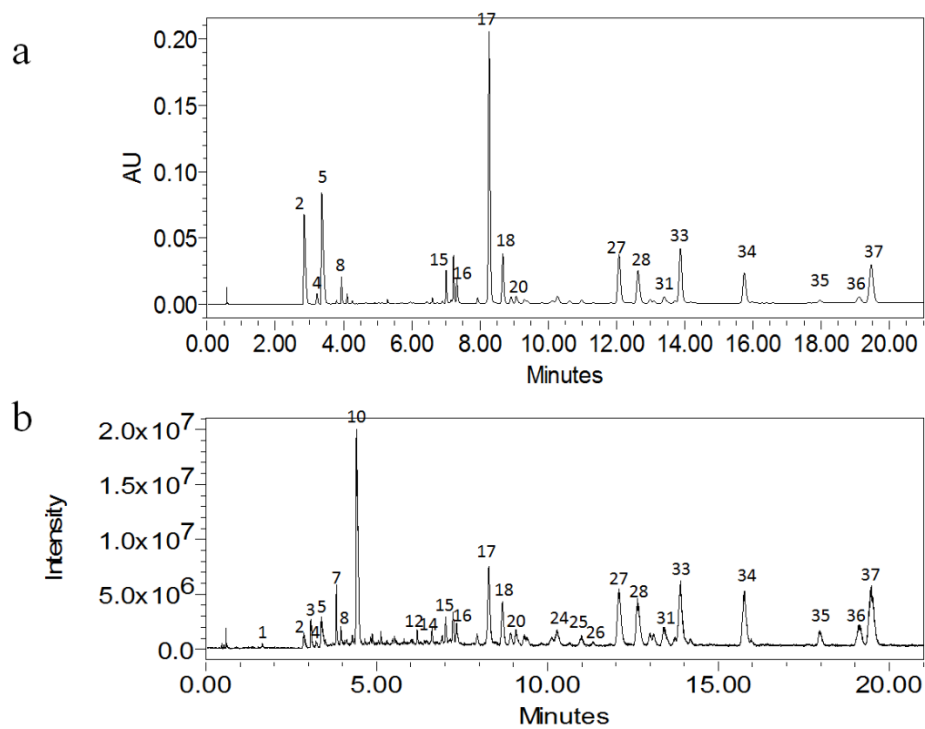

Figure S7. Chromatogram of a representative sample by UPLC-PDA (a)-QDa (b).

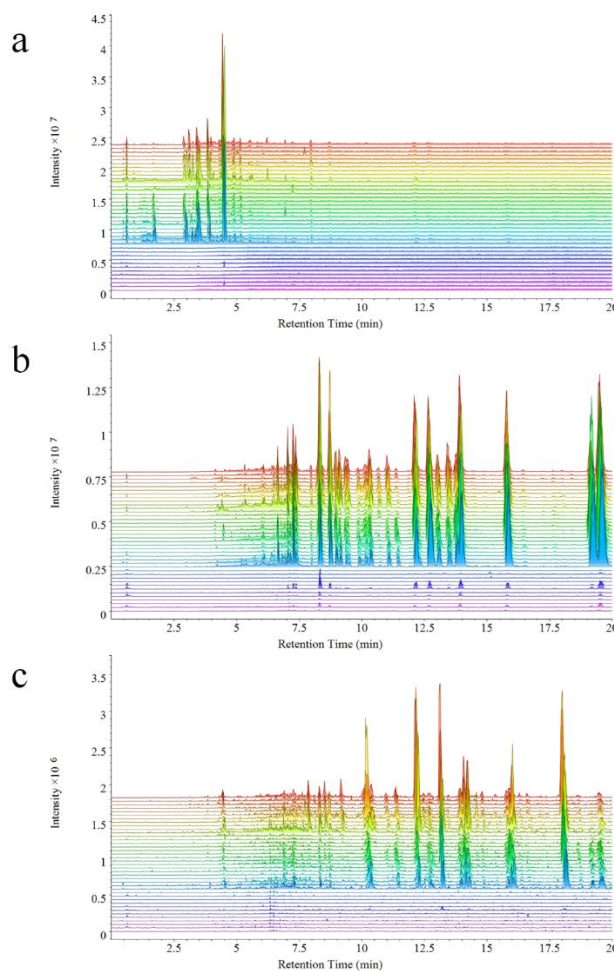

Figure S8. Extraction of different mass ranges (a: 150-380 Da, b: 380-650 Da, c: 650-800 Da)

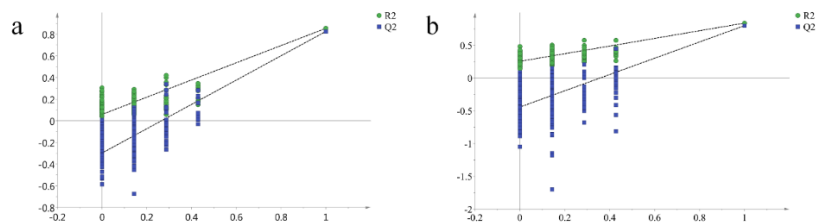

**Figure S9.** permutation test of OPLS-DA of PDA (a) and QDA (b).

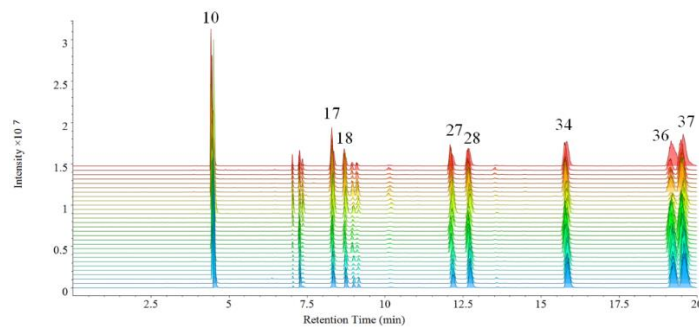

**Figure S10.** Extraction of eight characteristic peaks.

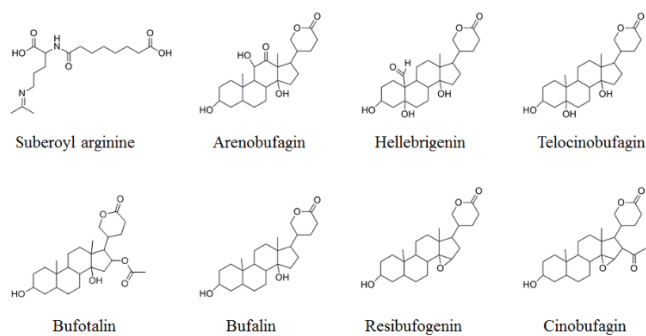

**Figure S11.** The chemical structures of seven characteristic constituents.

**Table S1.** Comparison of different analytical tools.

|                   | <b>Advantages</b>                                                                    | <b>Drawbacks</b>                                                                                                        |
|-------------------|--------------------------------------------------------------------------------------|-------------------------------------------------------------------------------------------------------------------------|
| <b>Separation</b> |                                                                                      |                                                                                                                         |
| TLC               | High flexibility<br>Easy to use<br>Low cost and high speed                           | Low reproducibility and resolution<br>Low sensitivity<br>Low efficiency in separation<br>Low accuracy in quantification |
| HPLC              | Automatable operating<br>High resolution, sensitivity and accuracy                   | Extended analytical time<br>Requirement for large volume of solvent                                                     |
| UHPLC             | High resolution separation<br>Reduced analytical time<br>Reduced solvent consumption | Sample preparation have high requirement                                                                                |
| HILIC             | Suitable for polar compounds<br>Environmentally friendly mobile phase                | Narrow range of application                                                                                             |
| GC                | High sensitivity<br>High resolution                                                  | Limited to volatile compounds<br>Thermal instability                                                                    |
| <b>Detection</b>  |                                                                                      |                                                                                                                         |
| MS                | High sensitivity<br>Powerful component characterization                              | Not easy operation<br>Low precision                                                                                     |
| UV                | Simple operation<br>Wide linear range<br>High precision                              | Low component characterization<br>Low sensitivity                                                                       |

**Table S2. The information of the 40 batches of VB samples.**

| <b>No.</b> | <b>Provider</b>                                        | <b>Production Region</b> | <b>Description</b> | <b>Collection Time</b> |
|------------|--------------------------------------------------------|--------------------------|--------------------|------------------------|
| S15        | Yongfa Chanchu breeding bases, Changyi district, Jilin | Jilin                    | Slice              | 04/2014                |
| S1         | Bozhou medicine market                                 | Unknown                  | Slice              | 04/2014                |
| S2         | Bozhou medicine market                                 | Unknown                  | Slice              | 04/2014                |
| S3         | Bozhou medicine market                                 | Shandong                 | Slice              | 05/2014                |
| S4         | Bozhou medicine market                                 | Shandong                 | Slice              | 06/2014                |
| S5         | Web of Chinese herbal medicins                         | Unknown                  | Slice              | 04/2014                |
| S6         | XingWang Chanchu breeding bases                        | Unknown                  | Slice              | 04/2014                |
| S7         | Anguo of Hebei                                         | Bozhou                   | Nubble             | 09/2014                |
| S8         | Anguo of Hebei                                         | Bozhou                   | Nubble             | 09/2014                |
| S9         | Anguo of Hebei                                         | Bozhou                   | Nubble             | 09/2014                |
| S10        | Yinfa, Linyi                                           | Sichuan                  | Nubble             | 09/2014                |
| S11        | Yinfa, Linyi                                           | Jilin                    | Nubble             | 09/2014                |
| S12        | Yinfa, Linyi                                           | Shandong                 | Nubble             | 09/2014                |
| S13        | Songjialiang, Linyi                                    | Shandong                 | Nubble             | 09/2014                |
| S14        | Anguo of Hebei                                         | Bozhou                   | Nubble             | 09/2014                |
| S15        | Bozhou medicine market                                 | Shandong                 | Slice              | 04/2014                |
| S16        | Guangming pharmacy, Anguo of Hebei                     | Jilin                    | Slice              | 04/2014                |
| S17        | Bozhou medicine market                                 | Henan                    | Slice              | 04/2014                |
| S18        | Shaanxi medicine market                                | Sichuan                  | Nubble             | 08/2014                |
| S19        | Songjialiang, Linyi                                    | Shaanxi                  | Nubble             | 09/2014                |
| S20        | Guangming pharmacy, Anguo of Hebei                     | Jilin                    | Nubble             | 04/2014                |
| S21        | Guangming pharmacy, Anguo of Hebei                     | Jilin                    | Slice              | 04/2014                |
| S22        | Bozhou medicine market                                 | Shandong                 | Slice              | 04/2014                |
| S23        | Bozhou medicine market                                 | Unknown                  | Slice              | 04/2014                |
| S24        | Shaanxi medicine market                                | South America            | Nubble             | 08/2014                |
| S25        | Yulin medicine market                                  | Bozhou                   | Slice              | 08/2014                |
| S26        | Yinfa, Linyi                                           | Anhui                    | Nubble             | 09/2014                |
| S27        | Yinfa, Linyi                                           | Shandong                 | Nubble             | 09/2014                |
| S28        | Songjialiang, Linyi                                    | Sichuan                  | Nubble             | 09/2014                |
